# Supplementary material
Source: Springer Nature journal article supplement (https://www.springermedizin.de/resource/supplementary/12933_2011_368_MOESM2_ESM.pdf/9538268)

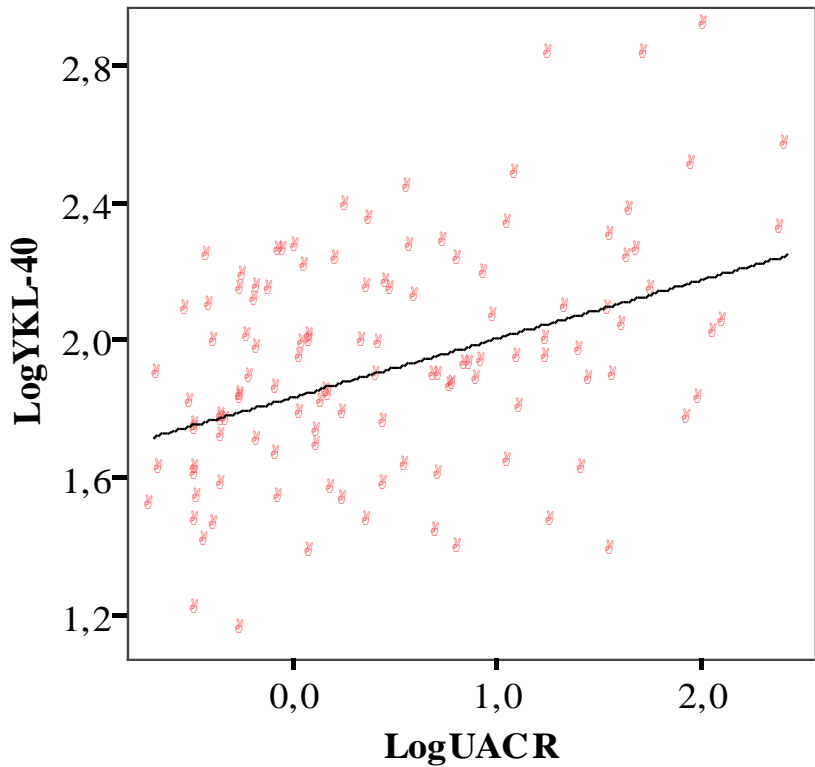

Supplement: MOESM2 [file 9538268]
